# Supplementary material
Source: publisher figshare collection journal article supplement (https://sage.figshare.com/ndownloader/files/14652101)
Supplement: Supplementary file 1 [file 14652101]

**Electroconvulsive stimulation differentially affects [11C]MDL100,907 binding to cortical and subcortical 5HT2A receptors in porcine brain**

Anne M. Landau, PhD a,b, Aage Kristian Olsen Alstrup, PhD b, Ove Noer MScb, Michael Winterdahl PhD b, Hélène Audrain PhD b, Arne Møller MD b,c, Poul Videbech DMSc d, Gregers Wegener DMSc a, Albert Gjedde, DMSc b,e,f, Doris J. Doudet, PhD g

aTranslational Neuropsychiatry Unit, bDepartment of Nuclear Medicine and PET Center, and cCenter of Functionally Integrative Neuroscience, Aarhus University and Hospital, Denmark, dCentre of Mental Health, Glostrup & University of Copenhagen, Denmark, eDepartment of Nuclear Medicine, University of Southern Denmark & Odense University Hospital, Odense, Denmark, fDepartment of Neurology and Neurosurgery, McGill University, Montreal, Canada, gDepartment of Medicine/Neurology, University of British Columbia, Vancouver, Canada
